# Supplementary material
Source: PubMed Central journal article supplement (PMC8192341)
Supplement: NIHMS1659115-supplement-SUP.pdf [file NIHMS1659115-supplement-SUP.pdf]

The association between adverse childhood experiences and childhood obesity: A systematic  
review

Supporting Information

Figure S1. Search strategy, by database, used on July 7, 2020

PubMed (n=2,590 results)

((("psychological trauma"[MeSH] OR ACE[tiab] OR ACES[tiab] OR "adverse childhood experiences"[MeSH] OR childhood-adversit\*[tiab] OR adversit\*[tiab] OR childhood-trauma\*[tiab] OR adverse-childhood\*[tiab] OR exposur\*[tiab] OR childhood-experienc\*[tiab] OR family-adversit\*[tiab] OR trauma\*[tiab] OR adverse-family-experienc\*[tiab] OR adverse-family-event\*[tiab] OR toxic\*[tiab] OR toxic-stress\*[tiab]))

AND

(obes\*[tiab] OR weight\*[tiab] OR overweight\*[tiab] OR "obesity"[MeSH] OR "pediatric obesity"[MeSH Terms] OR childhood-obesit\*[tiab] OR pediatric-obesit\*[tiab] OR bmi[tiab] OR waist-circumferenc\*[tiab] OR waist-size\*[tiab] OR body-mass-index\*[tiab] OR "body-mass-index-percentil\*" [tiab] OR "BMI percentil\*" [tiab] OR "body mass index"[MeSH] OR "body mass\*" [tiab] OR "body weight"[MeSH] OR body-weight\*[tiab] OR body-fat\*[tiab] OR z-score\*[tiab] OR adiposit\*[tiab] OR weight-problem\*[tiab] OR weight-issue\*[tiab] OR overeat\*[tiab] OR severe-obesit\*[tiab] OR (body-fat\*[tiab] AND percent\*[tiab]))

AND

("child"[MeSH] OR "adolescent"[MeSH] OR child\*[tiab] OR adolescen\*[tiab] OR teen\*[tiab] OR infan\*[tiab] OR "infant"[MeSH] OR baby[tiab] OR babies[tiab] OR kid[tiab] OR toddler\*[tiab] OR preteen\*[tiab] OR pediatric\*[tiab] OR "child, preschool"[MeSH] OR newborn\*[tiab] OR preschool-child\*[tiab] OR "infant, newborn"[MeSH])

NOT

("Animals"[Mesh])

NOT

("Animals"[Mesh] AND "Humans"[Mesh]))

Web of Science (n=2,278)

TS=("psychological trauma\*" OR "ACE" OR "ACES" OR "adverse childhood experience\*" OR "childhood adversit\*" OR "adversit\*" OR "childhood trauma\*" OR "adverse childhood\*" OR exposur\* OR "childhood experienc\*" OR "family adversit\*" OR "adverse family event\*" OR "toxic\*" OR "toxic stress\*")

TS=(obes\* OR weight\* OR overweight\* OR "childhood obesit\*" OR "pediatric obesit\*" OR bmi OR "waist circumferenc\*" OR "waist size\*" OR "body mass index\*" OR "body mass index percentil\*" OR "BMI percentil\*" OR "body mass\*" OR "body weight\*" OR "body fat\*" OR "z score\*" OR adiposit\* OR "weight problem\*" OR "weight issue\*" OR overeat\* OR "severe obesit\*" OR "body fat percent\*")

AND

TS=(child\* OR adolescen\* OR teen\* OR infan\* OR pediatric\*)

PsycInfo (n=3,276)

TI ACE OR AB ACE OR TI ACES OR AB ACES OR DE "Childhood Adversity" OR TI childhood-adversit\* OR AB childhood-adversit\* OR TI adversit\* OR AB adversit\* OR TI childhood-trauma\* OR AB childhood-trauma\* OR DE "Emotional Trauma" OR TI adverse-childhood\* OR AB adverse-childhood\* OR TI exposur\* OR AB exposur\* OR TI childhood-experienc\* OR AB childhood-experienc\* OR TI family-adversit\* OR AB family-adversit\* OR TI trauma\* OR AB trauma\* OR TI adverse-family-experienc\* OR AB adverse-family-

experienc\* OR TI adverse-family-event\* OR AB adverse-family-event\* OR TI toxic\* OR AB toxic\* OR TI toxic-stress\* OR AB toxic-stress\*

AND

TI obes\* OR AB obes\* OR DE "Obesity" OR DE "Overweight" OR TI weight\* OR AB weight\* OR TI overweight\* OR AB overweight\* OR TI childhood-obesit\* OR AB childhood-obesit\* OR TI pediatric-obesit\* OR AB pediatric-obesit\* OR TI bmi OR AB bmi OR TI waist-circumferenc\* OR AB waist-circumferenc\* OR TI waist-size\* OR AB waist-size\* OR TI body-mass-index\* OR AB body-mass-index\* OR TI body-mass-index-percentil\* OR AB body-mass-index-percentil\* OR TI "BMI percentil\*" OR AB "BMI percentil\*" OR DE "Body Mass Index" OR DE "Body Weight" OR DE "Overweight" OR DE "Weight Gain" OR TI "body mass\*" OR AB "body mass\*" OR TI body-weight\* OR AB body-weight\* OR DE "Body Fat" OR TI body-fat\* OR AB body-fat\* OR TI z-score\* OR AB z-score\* OR TI adiposit\* OR AB adiposit\* OR TI weight-problem\* OR AB weight-problem\* OR TI weight-issue\* OR AB weight-issue\* OR TI severe-obesit\* OR AB severe-obesit\*

AND

TI child\* OR AB child\* OR TI adolescen\* OR AB adolescen\* OR TI teen\* OR AB teen\* OR TI infan\* OR AB infan\* OR TI baby OR AB baby OR TI babies OR AB babies OR TI kid OR AB kid OR TI toddler\* OR AB toddler\* OR TI preteen\* OR AB preteen\* OR TI pediatric\* OR AB pediatric\* OR TI newborn\* OR AB newborn\* OR TI preschool-child\* OR AB preschool-child\*
